# Supplementary material for: A digital workflow from crystallographic structure to single crystal particle attributes for predicting the formulation properties of terbutaline sulfate
Source: Royal Society of Chemistry journal article supplement (doi:10.1039/d0ce00026d), 2020-01-01
Supplement: d0ce00026d1.pdf [file d0ce00026d1.pdf]

# ELECTRONIC SUPPLEMENTARY INFORMATION

---

## **A Digital Workflow from Crystallographic Structure to Single Crystal Particle Attributes for Predicting the Formulation Properties of Terbutaline Sulphate**

Thai T. H. Nguyen<sup>1,\*</sup>, Robert B. Hammond<sup>1</sup>, Ioanna D. Styliari<sup>2</sup>, Darragh Murnane<sup>2</sup>, Kevin J. Roberts<sup>1</sup>

<sup>1</sup> *Centre for the Digital Design of Drug Products, School of Chemical and Process Engineering, University of Leeds, Leeds, LS2 9JT, UK*

<sup>(2)</sup> *School of Life and Medical Sciences, University of Hertfordshire, Hertfordshire AL10 9AB, U.K.*

Communicating author: H. Nguyen1@leeds.ac.uk

### Abstract

The utility of synthonic modelling approach in understanding of organic salt materials (inhalation drug) at molecular scale by following a pathway from a molecule, intermolecular packing, crystal morphology, notably possibilities of calculated surface energy and hence predicted surface properties is presented in the main paper and in this supplementary material some additional information is provided. This comprises:

S1. Electronic charge

S2. Synthon analysis for strongest terbutaline-terbutaline cations, sulfate –sulfate anions in crystal lattice

S3. Analysis of the Surface Chemistry of the Habit Planes

S4. Visualization of preferred binding position of probe molecules (ethyl acetate, chloroform and toluene) on TBS crystal surfaces

S5. Adsorption Isotherms for the probes used in inverse gas chromatography

S6. Comparing the calculated lattice energy using Tripos forcefield and the enthalpy of sublimation for anhydrous sodium dodecyl sulfate (to validate the Tripos force field which can be used to calculate lattice energy for sulfate salt).

### **S1. Partial atomic charges calculated from MOPAC**

| Atom | Atomic charges | Atom | Atomic charges |
|------|----------------|------|----------------|
| S1   | 2.8182         | H19  | 0.1070         |
| O1   | -1.1332        | H20  | 0.0917         |
| O2   | -1.1588        | C13  | -0.0666        |
| O3   | -1.2283        | C14  | -0.1355        |
| O4   | -1.2369        | C15  | 0.1221         |
| C1   | -0.0668        | C16  | -0.2199        |
| C2   | -0.1636        | C17  | 0.1224         |
| C3   | 0.1696         | C18  | -0.2305        |
| C4   | -0.2307        | O8   | -0.2239        |
| C5   | 0.1050         | O9   | -0.2421        |
| C6   | -0.1828        | C19  | 0.0807         |
| O5   | -0.2243        | O10  | -0.3095        |
| O6   | -0.2578        | C20  | -0.0727        |
| C7   | 0.0891         | N2   | 0.0153         |
| O7   | -0.2643        | C21  | -0.0167        |
| C8   | -0.1344        | C22  | -0.1974        |
| N1   | 0.0074         | C23  | -0.1955        |
| C9   | -0.0202        | C24  | -0.1820        |
| C10  | -0.1819        | H21  | 0.1461         |
| C11  | -0.1975        | H22  | 0.1345         |
| C12  | -0.1852        | H23  | 0.1197         |
| H1   | 0.1697         | H24  | 0.2090         |
| H2   | 0.1339         | H25  | 0.2054         |
| H3   | 0.1178         | H26  | 0.1392         |
| H4   | 0.2785         | H27  | 0.2246         |
| H5   | 0.2069         | H28  | 0.1007         |
| H6   | 0.0667         | H29  | 0.1106         |
| H7   | 0.1616         | H30  | 0.2045         |
| H8   | 0.1123         | H31  | 0.2846         |
| H9   | 0.1826         | H32  | 0.0762         |

|     |        |     |        |
|-----|--------|-----|--------|
| H10 | 0.1911 | H33 | 0.1419 |
| H11 | 0.2263 | H34 | 0.0777 |
| H12 | 0.1006 | H35 | 0.0800 |
| H13 | 0.0959 | H36 | 0.0929 |
| H14 | 0.1091 | H37 | 0.0787 |
| H15 | 0.0805 | H38 | 0.0820 |
| H16 | 0.0936 | H39 | 0.0778 |
| H17 | 0.1088 | H40 | 0.1288 |
| H18 | 0.0799 |     |        |

## S2. Synthons analysis

The strongest repulsions within the crystal structure were found to be between the sulfate anions.

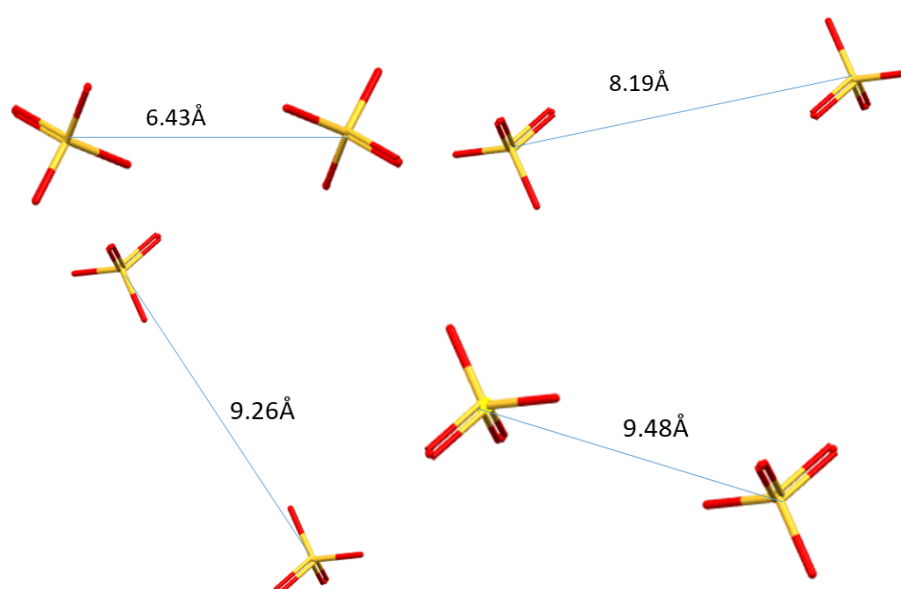

Figure S1. Molecular orientation of the top 4 repulsive synthons, indicating that the major repulsions were between the sulfate ions. All distances are quoted between sulfur atoms.

## S3. Analysis of the Surface Chemistry of the Habit Planes

(a)  $\{010\}$

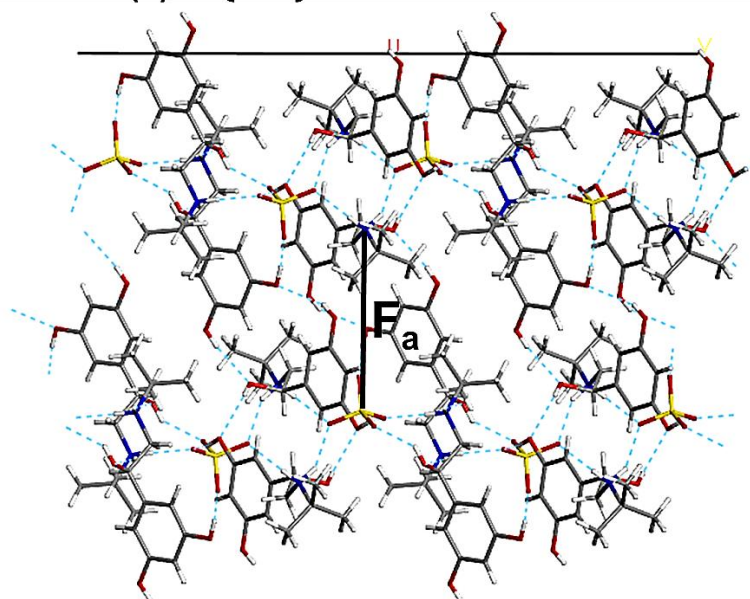

(b)  $\{100\}$

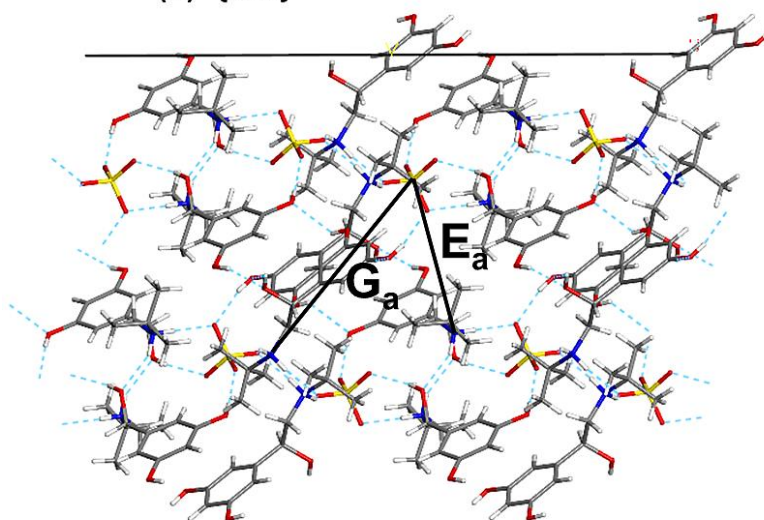

(c)  $\{001\}$

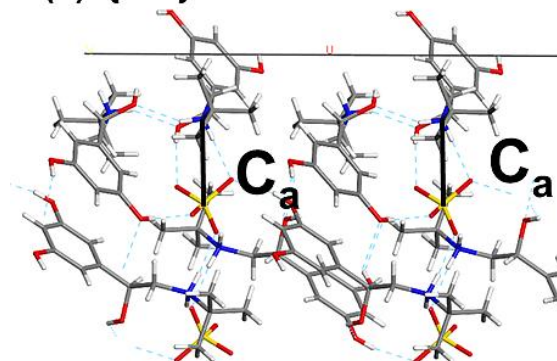

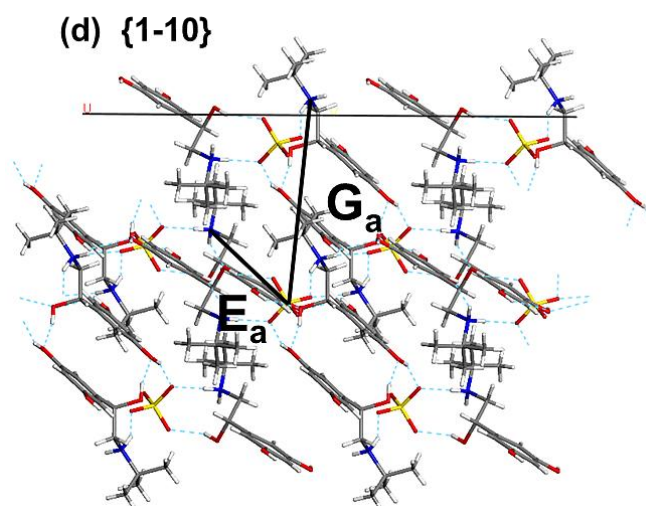

Figure S2. Molecular packing diagrams based upon the crystallographic structures: (a) molecular orientation at the  $\{010\}$  face with the strong synthons  $F_a$  marked as contributing to  $E_{ATT}$ ; (b) molecular orientation of the  $\{100\}$  surface with synthons  $E_a$  and  $G_a$  marked as contributing to  $E_{ATT}$ ; (c) molecular orientation of the  $\{001\}$  surface with synthons  $C_a$  marked as contributing to  $E_{ATT}$ ; and (d) molecular orientation of the  $\{1\bar{1}0\}$  surface with synthons  $E_a$ ,  $F_a$  and  $G_a$  contributing to the attachment energy ( $E_{ATT}$ ). Note that in this  $\{1\bar{1}0\}$  projection the  $F_a$  synthon is obscured by other molecules in the structure and hence is not easy to visualise.

#### S4. Preferred binding position of probe molecules on TBS crystal surfaces

The molecular orientations of the strongest interactions found from the SystSearch of an acetone, ethyl acetate, chloroform and toluene molecule (displayed in a ball and stick model) at the  $\{010\}$  surface,  $\{100\}$  surface,  $\{001\}$  surface and  $\{1\bar{1}0\}$  surface of TBS crystals (displayed in a stick model) were visualised using the Mercury software.

## S4.1 Acetone

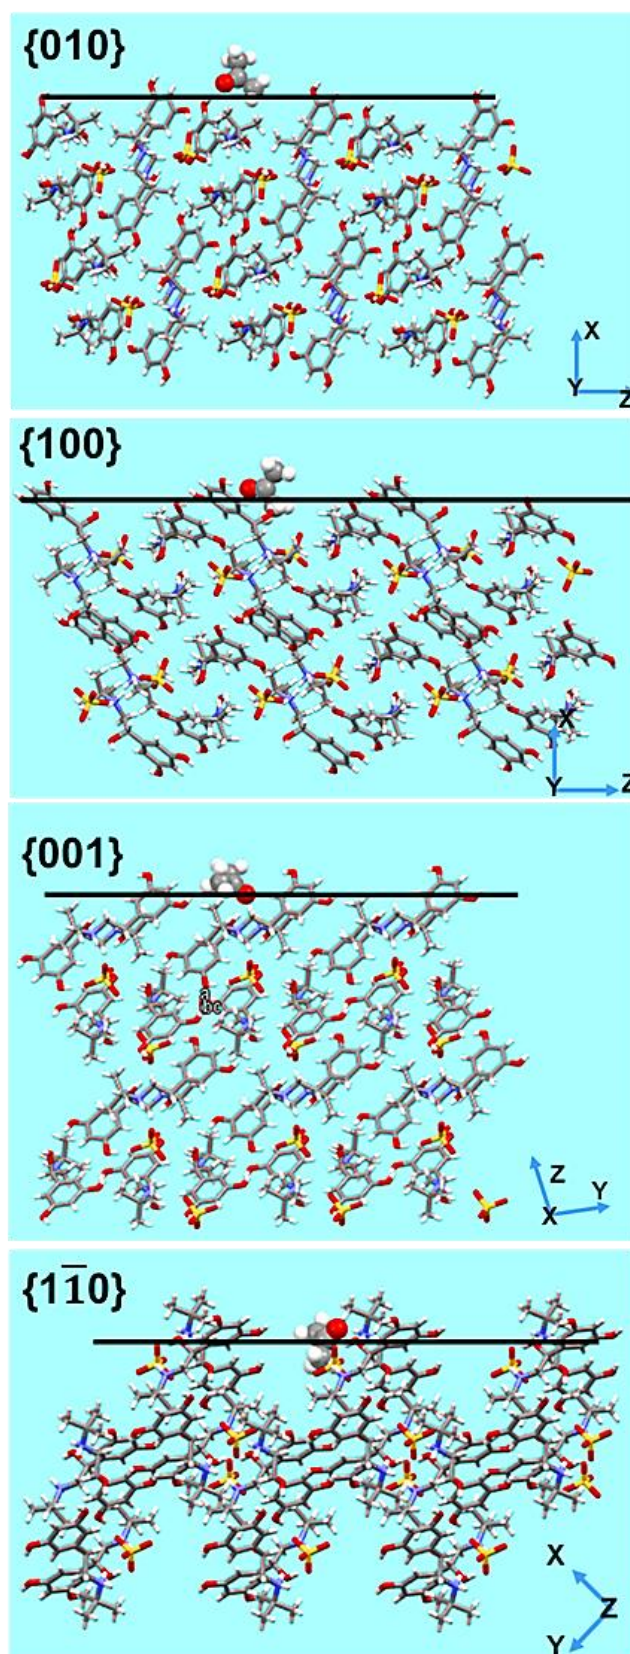

Figure S3. Preferential binding position of an acetone molecule at the TBS crystal surfaces.

## S4.2 Ethyl acetate

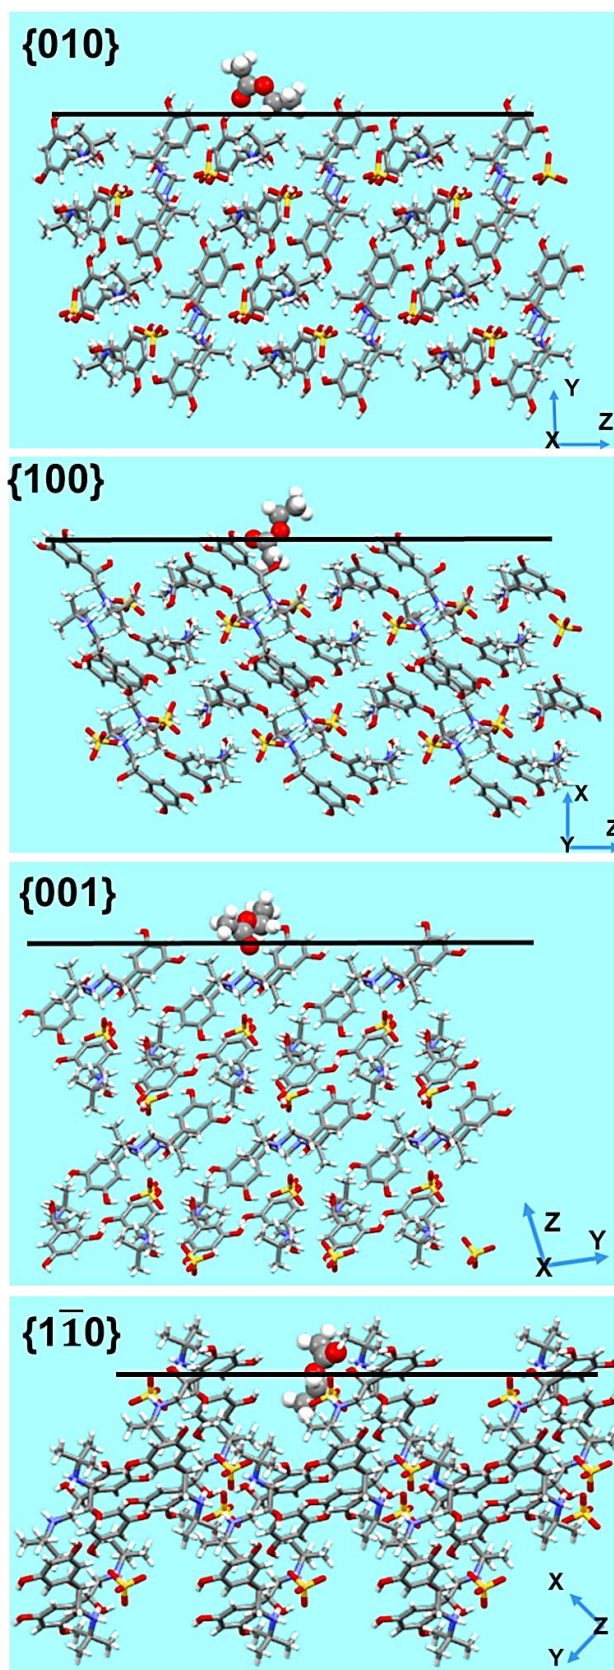

Figure S4. Preferential binding position of an ethyl acetate molecule at the TBS crystal surfaces.

### S4.3 Chloroform

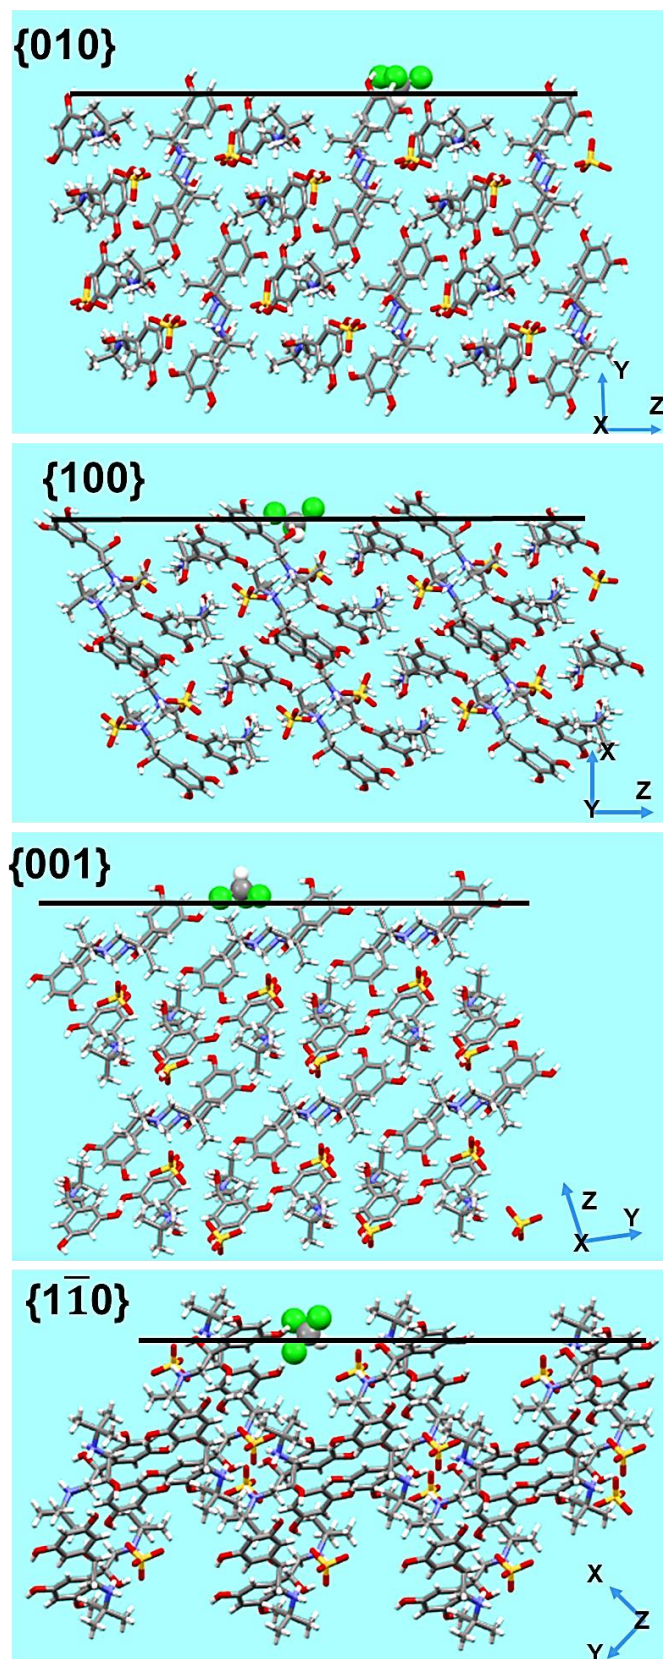

Figure S5. Preferential binding position of a chloroform molecule at the TBS crystal surfaces.

## S4.4 Toluene

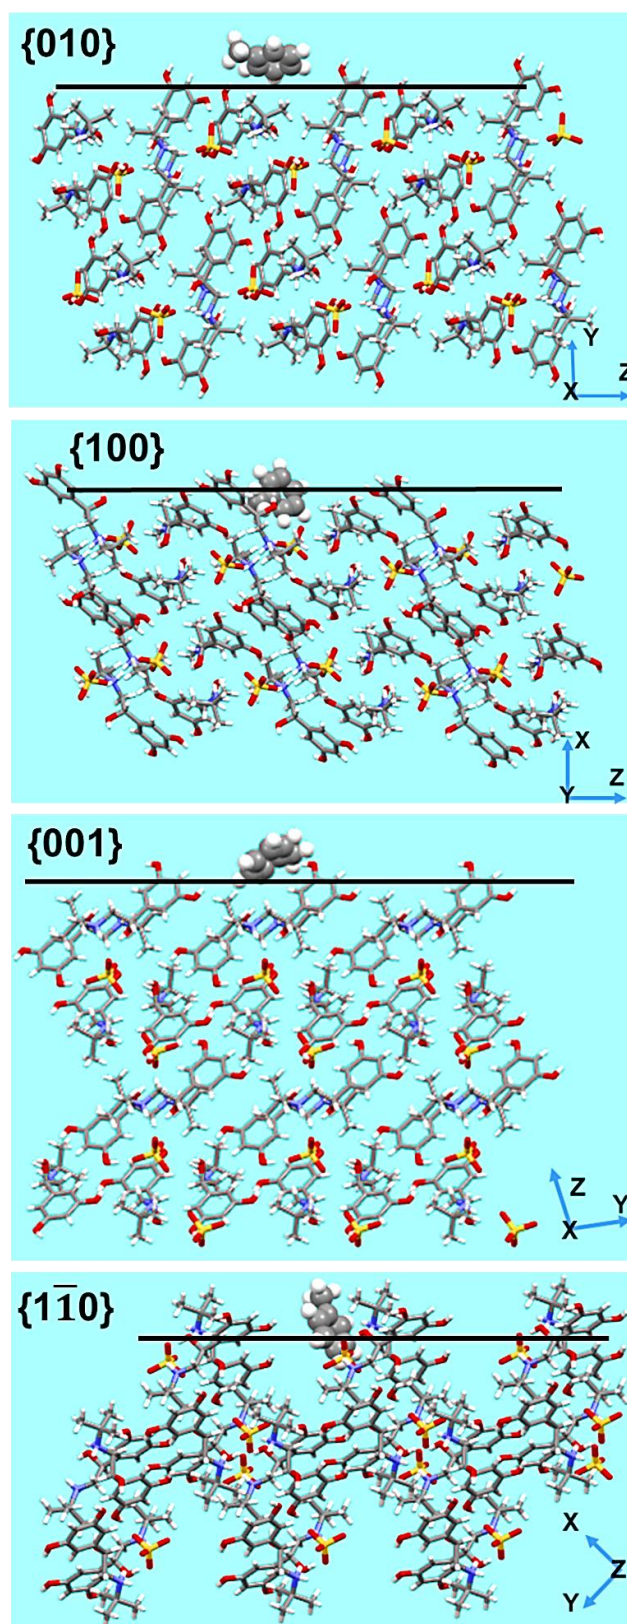

Figure S6. Preferential binding position of a toluene molecule at the TBS crystal surfaces.

## S5. IGC data

Adsorption isotherms produced from the adsorbed amount of the probes as a function of the partial pressure in the iGC-SEA, over the range of targeted surface coverages 0.5%-13 %.

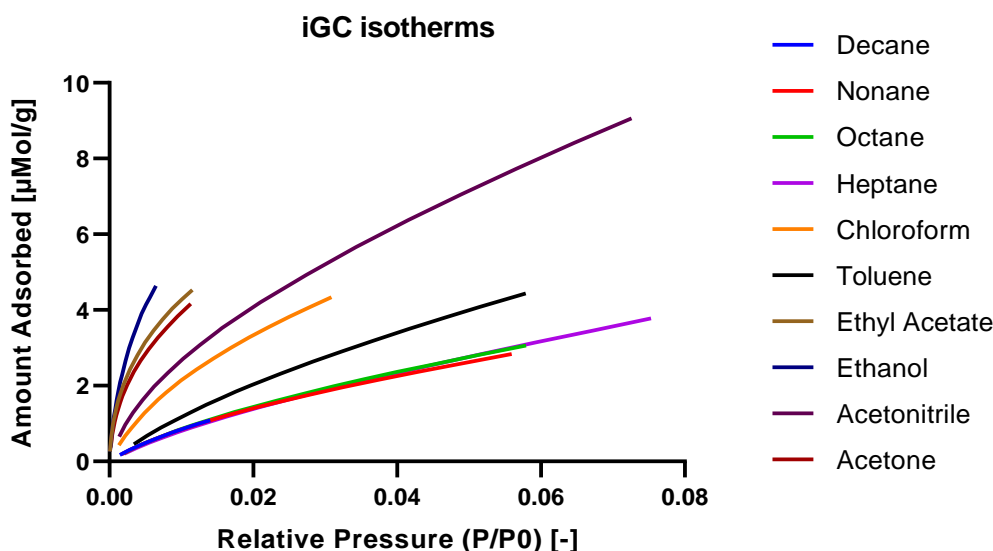

Figure S7. Adsorption Isotherms for the probes used in inverse gas chromatography

## S6. Comparing the calculated the lattice energy using Tripos forcefield and the enthalpy of sublimation for anhydrous sodium dodecyl sulfate

In this calculation the atomic coordinates were taken from the crystal structure (CSD reference code VECYOR01) <sup>1</sup>. The partial charges were used from the previous publication <sup>2</sup>. The later paper reports a molar dissolution enthalpy in water for SDS of 7.63 kcal/mol, the molar enthalpies of hydration for dodecyl sulfate anion of 67.0 kcal/mol and sodium cation of 98.5 kcal/mol. An enthalpy of sublimation for SDS, assuming ideal solutions, can be estimated as  $7.63 + 0.5 \cdot (67.0 + 98.5) = 90.4$  kcal/mol (mole of salt).

The lattice energy was calculated to be -93.2 kcal/mol on the same basis (with the coulombic contribution -81.7 kcal/mol and van der Waals contribution -11.5 kcal/mol).

The data showed that there is a good agreement between the enthalpy of sublimation and the calculated lattice energy using Tripos force for anhydrous sodium dodecyl sulfate.

## References

1. L. Smith, R. Hammond, K. Roberts, D. Machin and G. McLeod, *Journal of Molecular Structure*, 2000, **554**, 173-182.
2. L. A. Smith, G. B. Thomson, K. J. Roberts, D. Machin and G. McLeod, *Crystal growth & design*, 2005, **5**, 2164-2172.
